# Supplementary material
Source: publisher site journal article supplement (https://www.kjim.org/upload/media/kjim-2024-148-Supplementary-Table-2.pdf)
Supplement: Supplementary file 1 [file kjim-2024-148-Supplementary-Table-2.pdf]

**Supplementary Table 2. Baseline characteristics of control participants and patients with RA**

|            | Control (n = 14) | RA (n = 70) | <i>p</i> value |
|------------|------------------|-------------|----------------|
| Age (yr)   | 55.0 ± 3.4       | 57.0 ± 6.1  | 0.100          |
| Sex, women | 9 (64.3)         | 49 (70.0)   | 0.754          |
| RA-ILD     | -                | 35 (50.0)   | -              |
| TL (kb)    | 9.5 ± 0.8        | 8.3 ± 2.5   | 0.002          |

Values are presented as mean ± standard deviation or number (%).

RA, rheumatoid arthritis; ILD, interstitial lung disease; TL, telomere length.

Control participants and RA patients were matched 1:5 by age and sex.
